# Supplementary material for: Combining Biomarkers for the Diagnosis of Metastatic Melanoma
Source: MDPI journal article supplement (doi:10.3390/jcm13010174), 2023-12-28
Supplement: s1 [file s1]

## Supplementary materials

**Supplementary Table S1.** Diagnostic effect of biomarkers and the combinations

| Variables         | Cut-off | Training set                              |                         |                         |                      |                      |                                    | Validation set                            |                         |                         |                      |                      |                                    |
|-------------------|---------|-------------------------------------------|-------------------------|-------------------------|----------------------|----------------------|------------------------------------|-------------------------------------------|-------------------------|-------------------------|----------------------|----------------------|------------------------------------|
|                   |         | AUROC<br>[95% CI]<br><b>p-value</b>       | Sensitivity<br>[95% CI] | Specificity<br>[95% CI] | PPV<br>[95% CI]      | NPV<br>[95% CI]      | Diagnostic<br>accuracy<br>[95% CI] | AUROC<br>[95% CI]<br><b>p-value</b>       | Sensitivity<br>[95% CI] | Specificity<br>[95% CI] | PPV<br>[95% CI]      | NPV<br>[95% CI]      | Diagnostic<br>accuracy<br>[95% CI] |
| S100B+LDH         | 0.443   | 0.650<br>[0.555; 0.746]<br><b>p=0.003</b> | 0.38<br>[0.26; 0.52]    | 0.90<br>[0.81; 0.96]    | 0.73<br>[0.57; 0.85] | 0.67<br>[0.62; 0.71] | 0.68<br>[0.60; 0.76]               | 0.687<br>[0.547; 0.828]<br><b>p=0.009</b> | 0.50<br>[0.31; 0.69]    | 0.85<br>[0.70; 0.94]    | 0.70<br>[0.51; 0.84] | 0.71<br>[0.62; 0.78] | 0.71<br>[0.58; 0.81]               |
| S100B+OPN         | 0.465   | 0.658<br>[0.560; 0.755]<br><b>p=0.002</b> | 0.41<br>[0.29; 0.55]    | 0.90<br>[0.81; 0.96]    | 0.75<br>[0.59; 0.86] | 0.68<br>[0.63; 0.73] | 0.70<br>[0.61; 0.77]               | 0.709<br>[0.575; 0.843]<br><b>p=0.004</b> | 0.54<br>[0.34; 0.73]    | 0.83<br>[0.67; 0.93]    | 0.68<br>[0.50; 0.82] | 0.72<br>[0.63; 0.80] | 0.71<br>[0.58; 0.81]               |
| LDH+OPN           | 0.437   | 0.643<br>[0.549; 0.738]<br><b>p=0.004</b> | 0.45<br>[0.32; 0.59]    | 0.80<br>[0.70; 0.88]    | 0.62<br>[0.49; 0.73] | 0.67<br>[0.61; 0.72] | 0.65<br>[0.57; 0.73]               | 0.643<br>[0.500; 0.785]<br><b>p=0.046</b> | 0.46<br>[0.28; 0.66]    | 0.83<br>[0.67; 0.93]    | 0.65<br>[0.46; 0.80] | 0.69<br>[0.60; 0.76] | 0.68<br>[0.55; 0.79]               |
| S100B+LDH<br>+OPN | 0.391   | 0.669<br>[0.575; 0.763]<br><b>p=0.001</b> | 0.64<br>[0.50; 0.76]    | 0.69<br>[0.57; 0.79]    | 0.58<br>[0.50; 0.68] | 0.72<br>[0.64; 0.79] | 0.67<br>[0.58; 0.75]               | 0.712<br>[0.573; 0.850]<br><b>p=0.003</b> | 0.64<br>[0.44; 0.81]    | 0.78<br>[0.62; 0.89]    | 0.67<br>[0.51; 0.79] | 0.76<br>[0.65; 0.84] | 0.72<br>[0.60; 0.82]               |

Significant results are in bold. AUROC – area under the receiver operating characteristics. PPV- positive predictive value. NPV – negative predictive value. 95% CI – 95% confidence intervals, LDH – lactate dehydrogenase; OPN – osteopontin
